# Supplementary material
Source: Frontiers journal article supplement (https://www.frontiersin.org/articles/498922)
Supplement: Table_1.doc [file Table_1.doc]

Supplementary text 1: detailed description and interpretation of microfacies for the FF section

This section presents an inventory of the microfacies characterizing the Early-Late Givetian succession in the FF section.

The FF section being a lateral equivalent of the La Thure section, the microfacies described for this section can be similar to those previously described in La Thure (Pas et al. 2017). Thus, to denote microfacies of the FF section we used a similar system than in Pas et al. (2017), which relates to both the model type (DS - Drowning shelf, RS - Rimmed shelf and RP - Ramp) and the studied locality (FF - Fromelennes-Flohimont). Therefore, when microfacies described in this study were similar to those already defined and published in Pas et al. (2017) (e.g., RS3-LT4) the label “LT” was used to avoid new layers of labelling. Finally, to build a comprehensive sedimentological models for the Givetian Ardennes platform, microfacies label as in Pas et al. (2017) had to be adjusted (see adjustment in the Table at the end of this text)

In the following text, microfacies defined for the FF section are individually described and interpreted. For clarity we also added the updated labelling for the LT section within the table.

Due to the complexity and diversity of depositional settings which define the rimmed shelf profile, we have divided it into seven facies belts (RS1-RS7): (RS1) fore-reef to off-reef shelf; (RS2) biostromal and fore-reef shelf; (RS3) bioclastic shoals; (RS4) internal shelf with fair circulation; (RS5) internal restricted shelf; (RS6) internal evaporitic shelf and (RS7) supratidal shelf setting. Facies belts RS1 and RS7 do not occur in the La Thure section while the facies belt RS4 is not observed in the Fromelennes-Flohimont section. The drowning shelf is characterized by one microfacies (DS-LT1).

Our microfacies classification follows approximately a distal to proximal depositional setting (considering that some microfacies could be lateral equivalents). Furthermore, some microfacies represent event-like features, and are thus not limited to one or another depositional setting. The subdivisions between carbonate platform types and related interpretations were discussed in Pas et al. (2017).

**Fromelennes-Flohimont section (FF)**

**Drowning carbonate shelf model: Microfacies DS**

*DS-LT1: Mudstone and wackestone with densely-packed brachiopod-bivalve shells packstone-rudstone levels and pockets*

This microfacies characterizes the upper part of the Fromelennes Fm and its description is similar to the description made for the La Thure section. However, in the Fromelennes-Flohimont road section, this microfacies exposes cm-thick layers corresponding to mudstone and wackestone with small amount of bioclasts. The combination of observation from Fromelennes-Flohimont and La Thure localities allows to implement description of this microfacies.

**Ramp model: Microfacies RP**

*RP1-FF1: Palaeosiphonocladale and shell-rich bioclastic wackestone-packstone*

Main characteristics of this microfacies are the common occurrence of shells such as brachiopods, gastropods, trilobites and abundance of palaeosiphonocladales such as issinellid and palaeoberesellid. Widespread bioclastic hash (i.e. unidentifiable fine-grained organisms) is an important characteristic of this microfacies. The organisms observed are commonly broken, showing moderately-rounded shape and displaying a size varying from 0.5 to 2 cm. Algae show a range between 0.1 and 0.4 cm (entire longitudinal section), are poorly-preserved and recognized by the yellowish color of their thallus, which is usually bowed. Locally, internal part of the thallus is filled by a darker micrite contrasting with the lighter surrounding micrite. In this case, it is common to observe infra-mm sized micritic lithoclasts. Other allochems are *Girvanella* lumps, peloids, calcisphere, bryozoan, wackestone-packstone intraclasts and rare branching tabulate corals (*Hilaepora*) and stromatoporoid debris. Preservation of bioclasts varies: crinoids often show pitting and micritic rim while gastropods are locally encrusted by spongiostromate. Locally, mm- to pluri-mm-sized pockets or grainstone layers with sparitic cement including peloids, gastropods (mold filled by micrite), micritic clasts and mud-coated grains occur (this is similar to the RP-LT2 defined for the La Thure section). Densely-packed areas where shells are oriented parallel to the bedding can be seen. In this microfacies, bioturbations are common and usually underlined by the circular-shape and the reorganization of bioclasts cemented by sparite. A significant character of this microfacies is also the occurrence of mm- to cm-thick rich argillaceous horizons and occurrence of disseminated silt-sized quartz. Dolomitization is also common.

*Interpretation:*

The wackestone and packstone texture and the biotic influence from both semi-restricted (e.g. issinellid, palaeoberesselid; Mamet, 1991) and more open marine setting (e.g., crinoids) indicate a depositional setting with two biotic influences. The general poor-sorting of this sediment and the micritic matrix attest of a deposition in a relatively quiet setting, but the occurrence of locally well-sorted shells and bioclastic layers as well as intraclasts are in favor of high-energy events such as storm waves. Thus, this sediment is likely deposited within the storm wave base (SWB) close to the fair weather wave zone (FWWZ). The rare occurrence of tabulate corals and stromatoporoids advocates either for a setting located out of reefal influence or to the scarcity of reefal structure. In such carbonate setting, the local occurrence of siliciclastic materials (clay, mica and silt-sized quartz) demonstrates the land to basinwards supply of detrital material and low-energy water condition enabling the settlement of these particles. The locally abundant argillaceous materials and the dissemination of silt may indicate a direct connection with the landmass bordering this marine setting.

*RP2-FF2: Peloidal grainstone*

This microfacies is characterized by the abundance of peloids, the grainstone texture and a general good-sorting of the allochems. Based on the size and shape of peloids and occurrence of palaeosiphonocladales we divided this microfacies into two groups: (1) fine-grained peloidal grainstone and (2) peloidal bioclastic grainstone with palaeosiphonocladales.

*RP2-FF2a: Fine-grained peloidal grainstone*

This microfacies is mainly characterized by the abundance of fine-grained and well-rounded peloids (size ranging between 0.1 and 0.2 mm), very good-sorting and the occurrence of local planar and oblique lamination. Other allochems show a variable preservation state ranging from moderately-preserved to poorly-preserved and intensively micritized crinoids, brachiopods, gastropods, palaeosiphonocladales and unrecognized bioclasts. Their size is similar to or slightly bigger than peloids size. Planar and oblique laminations are underlined by mm- to cm-thick layers enriched in crinoids, brachiopods, ostracods and trilobites. These layers are oblique to the bedding and locally correspond to cross-stratification. A laminar fabric underlined by the alternation of darker and lighter levels may occur locally. The cement of this grainstone is microsparitic

*Interpretation:*

This abundance of well-rounded peloids and the good sorting of this sediment indicate a setting where water energy is high, likely within the FWWB. Furthermore, the local occurrence of hummocky cross stratification observed at the outcrop scale and planar and oblique laminations attest of a setting influenced by storms. The grainstone texture coupled with the preservation of the sedimentary structures and bioclastic layers suggest a location around the FWWB (Burchette and Wright, 1992). Peloids probably have a shallow-water low-energy origin (Tucker and Wright, 1990). Layers enriched in crinoids, brachiopods in a grainstone texture correspond to a concentration of bioclasts in relation with storms. In this microfacies, crinoids and brachiopods (open-marine biota) are associated with palaeosiphonocladales and gastropods (semi-restricted to marine biota). The occurrence of a mixture of bioclasts from open-marine and semi-restricted water also suggests a location halfway between semi-restricted and open-water environment. This microfacies could correspond to peloidal sand bar in a homoclinal ramp setting.

*RP2-FF2b: Peloidal bioclastic grainstone with palaeosiphonocladales*

The main difference with RP-FF2a is the extensive occurrence of palaeosiphonocladales such as issinellid, the abundance of peloids showing various sizes (between 0.1 and 0.4) and shapes (e.g., lithic peloid; Flügel, 2004) and the higher occurrence of preserved bioclasts such as crinoids, brachiopods, mollusks and bryozoans. Micritization of bioclasts is also important in this microfacies but relics of former bioclasts are preserved locally. The size of bioclasts varies from 0.1 to 1 mm (locally pluri-mm in size). Rare reef-builders debris such as tabulate corals and stromatoporoids occur.

*Interpretation:*

Abundant occurrence of issinellids likely indicates lagoonal or at least restricted marine environment. Indeed, according to Mamet and Préat (1986) palaeosiphonocladales occur in various shallow-water setting but they are mostly associated with semi-restricted environment such as lagoons. An abundance of lithic peloids and bioclasts such as crinoids, gastropods and bryozoans showing a better preservation level than in the RP-FF2a, indicates a more protected setting compared to RP-FF2a and probably closer to palaeosiphonocladales meadows considering their abundance. This microfacies must be located in a more proximal location than RP-FF2a.

**Rimmed shelf model: Microfacies RS**

**Facies belt 1: Fore-reef shelf and off-reef**

*RS1-FF1: Argillaceous crinoidal – brachiopods mudstone*

This microfacies only occurs in the Mont d’Haurs Fm. Moreover, they are collected from deeply weathered and argillaceous beds, which are barely outcropping. It overlays beds characterized by microfacies RS2-LT2 and RS2-FF3 and underlays microfacies RS6-LT12 (internal restricted belt). Microfacies RS1-FF1 is mainly characterized by a mudstone texture and local occurrence of crinoids, brachiopods and trilobites. These organisms are mm in size and show a moderate- to poor-sorting. Locally, wackestone-packstone layer showing similar faunal assemblage occur. Bioturbation is visible and is either underlined by circular reorganization of bioclasts or by a contrast of colour in relation with quartz content. The matrix is a slightly argillaceous micrite with significant dissemination (locally 30 %) of silt-sized quartz grains. According to Flügel (2004; p.74) this matrix is called “calcisiltite”. Mica sheets and insoluble residue also occur commonly.

*Interpretation:*

The mudstone texture and the faunal assemblage attest to an open-marine environment located in a low-energy setting likely below the FWWB. The low energy setting is also attested by the occurrence of clay. Bioturbation suggests oxygenated bottom-water conditions. According to the occurrence of this microfacies overlying RS2-LT2 and RS2-FF3 and underlying RS6-LT12, it is assumed that these argillaceous crinoidal – brachiopods mudstone belongs to the shelf model.

**Facies belt 2: External reef shelf and fore-reef**

*RS2-LT1: Open-marine bioclastic wackestone-packstone*

This microfacies is similar to the one described for the La Thure section (see Pas et al. 2017 for the full description and interpretation).

*RS2-FF2: Fine- to coarse-grained crinoidal bioclastic packstone*

This microfacies occurs mainly within the uppermost part of the Terres d’Haurs Fm and in the lower part of Mont d’Haurs Fm, prior the m-thick biostromal accumulation (e.g., RS2-LT2). It is mainly characterized by the extensive occurrence of crinoids, the common occurrence of bioclasts such as brachiopods, and the bioturbations. Crinoids display a size ranging from 0.2 to 3 mm and a poorly- to moderate-preservation (e.g. they are either broken, intensively micritized or show pitting). In order of decreasing abundance other bioclasts are brachiopods, gastropods and ostracods, bryozoans, stromatoporoids, rugose corals, *Girvanella* lumps, palaeosiphonocladales, worm tubes and trilobites. Fine-grained peloids are also recognized in the sediment with respect to the low contrast with the dark-brown micritic matrix. Gastropod remains are commonly encrusted by *Girvanella* or show their mold filled by a dark brown micrite. Bioturbations are circular, mm-sized and mainly underlined by reorganization of finely-broken unidentifiable bioclasts. From time to time, the sediment of this microfacies is affected by pressure-solution processes underlined by an iden-supported fabric and the occurrence of insoluble rich residue observed into pressure-solution seams. The matrix is micritic, pale brown in color and quartz grains occur occasionally.

*Interpretation:*

The large occurrence of crinoids within packstone texture intercalated into RS2-LT2 microfacies indicates a setting in the vicinity of crinoidal meadow and strongly influenced by reefal construction. The occurrence of trilobite and brachiopods suggests a fully-marine setting though gastropods, *Girvanella* and palaeosiphonocladales are rather in favor of more restricted water conditions. Occurrence of both biotic assemblages might be related to mixing due to eworking which affects the shallow-marine environment. This microfacies likely represents a crinoidal meadow flanking a fore-reef slope below the FWWB.

*RS2-LT2: Coral-stromatoporoid flaotstone and rudstone*

This microfacies is similar to the one described for the La Thure section although much thicker in the Fromelennes-Flohimont section. See Pas et al. 2017 for the full description and interpretation.

*RS2-FF3: Dendroid stromatoporoid and bioclast-rich rudstone*

This microfacies occurs mainly in the upper portion of the Mont d'Haurs Fm intercalated within RS2-LT2 microfacies. It is characterized by the occurrence of dendroid stromatoporoids such as *Amphipora* and *Stachyodes* embedded in a bioclastic wackestone to packstone texture showing poor-sorting. *Amphipora* are mm- to cm in size while *Stachyodes* are larger (cm to pluri-cm). Bulbous stromatoporoids are also locally clearly exposed and better preserved; they are over 1 cm in size. When the sediment is not affected by dolomitization, the space between stromatoporoids is filled by wackestone-packstone sediment rich in poorly-preserved bioclast such as crinoids, brachiopods, stromatoporoids, rugose and tabulate corals. Peloids, thick-shelled ostracods, *Girvanella* like-encruster or lumps, palaeosiphonocladales and unidentified shells are also observed. Pressure-solution processes underlined by concavo-convex contact, stylolithes and insoluble rich residue seams occur.

*Interpretation:*

As mentioned above (RS5-LT12), *Amphipora* and *Stachyodes* are characteristic of back-reef and lagoonal settings (Cornet, 1975; Pohler, 1998; Wood, 2000) and their accumulation in the Belgian Givetian limestone is interpreted as enhanced by storm waves reworking lagoonal setting. In this case, a mixture of dendroid stromatoporoids with numerous open-marine organisms (e.g., reef-builders, crinoids, brachiopods), as observed in this microfacies, reflects either a seaward transport via storm wave action or the vicinity with the open-marine reefal construction or a landward transport of open-marine organisms. The second hypothesis fits with the intercalation of RS2-FF3 in RS2-LT2 reef-builders rudstone. In comparison with RS2-LT2, this microfacies must be located in location close to open-marine reefal construction, and considering the texture, deposited within the FWWZ.

**Facies belt 3: Bioclastic shoals**

*RS3-LT4: Peloidal – lithoclastic grainstone with gastropods and mud-coated grains for La Thure equivalent microfacies)*

This microfacies is similar to the one described for the La Thure section (see Pas et al. 2017 for the full description and interpretation).

**Facies belt 5: Internal restricted shelf**

*RS5-LT10b-c: Oolite lithoclastic grainstone – packstone*

This microfacies is similar to the one described for the La Thure section (see Pas et al. 2017 for the full description and interpretation).

**Facies belt 6: Internal evaporitic shelf**

*RS6-LT12: Dendroid stromatoporoid floatstone to rudstone*

This microfacies is similar to the one described for the La Thure section (see Pas et al. 2017 for the full description and interpretation).

*RS6-FF4: Micritic lithoclasts and peloidal grainstone*

This microfacies only occurs within the Fromelennes Fm. It is mainly characterized by the abundance of variously-sized and shaped peloids (e.g., lithic peloid; Flügel, 2004; p.112) and lithoclasts that also display a large range of shape and size (sub-angular to sub-rounded, and mm to pluri-cm in size). Both allochems represent up to 90% of the sediment. Lithoclasts are either micritic mudstone or peloidal grainstone. Locally a rim of fibrous calcite surrounds these allochems. Ooids and micritized ooids scattered within the sediment are observed. More rarely, these ooids are concentrated within peloidal – oolitic layers (likely allochthonous ooids). Other allochems are not common and represented by *Amphipora,* thick-shelled ostracods, calcisphere, broken brachiopod shells, unidentified conical shells and palaeosiphonocladales. Exception for some brachiopod shells, which are cm in size, most of the remaining allochems are mm in size. The cement of this sediment is sparitic and locally dolomitized; this is highlighted by the occurrence of infra-mm dolomite rhombohedra. Locally, this microfacies overlies thick layer of mudstone texture. Transition between mudstone and grainstone is either sharp or gradual. Sometime, the occurring mudstone shows circular or irregular burrows filled by peloidal grainstone. A similar microfacies was described by Boulvain and Préat (1986; Type 5) for Upper Givetian sequences in southern Belgium.

*Interpretation:*

Abundant lithic peloids and mudstone lithoclasts in a grainstone texture suggest intense reworking of a lithified micritic mud or micrite either by tidal flooding or storm wave. Furthermore, the limited occurrence of organisms indicates restricted environment hostile to forms of life. The local occurrence of brachiopods and *Amphipora* suggests a reworking triggered by storm capable of transporting such organisms landward. Local occurrence of RS6-FF6 underlying this microfacies indicates vicinity with inter- to subtidal ponds (see description of RS6-FF6 below). Occurrence of Type 4 ooids (Strasser, 1986) indicates restricted environment and lithic peloids with rim of calcite cement points to meteoric phreatic environment (Flügel, 2004; p.300).

*RS6-FF5: Mudstone-wackestone with green algae, ostracods and gastropods*

This microfacies occurs in the Trois-Fontaines Fm. It is characterized by a wide spectrum of texture between two end-members and by frequent occurrence of green algae such as *kamaena, triangulinella* and thick-shelled ostracods. Green algae are characterized by various preservation stages; from well- to poorly-preserved and with a size oscillating between 0.3 and 0.5 mm. They are always easily recognizable by their yellowish calcite forming thallus. Ostracods are mostly represented by thick-shelled specimens while a few thin-shelled can be found locally. Their size ranges from 0.3 to 1 mm. Other allochems are gastropods, *Amphipora*, peloids (e.g., reworked cyanobacteria mat), calcispheres, bispheres, *labyrinthoconus*, *ortonella,* irregular fenestrae and unidentifiable bioclastic hash. From time to time, irregular-shaped pockets are filled with dolomite crystals. Fenestrae are commonly mm- to cm-sized and locally feature geopetal fabric (lower part is filled by micrite while upper part by sparite). Locally, unidentifiable micro-bioclasts are spread in the micritic mud.

*Interpretation:*

The mudstone-wackestone texture indicates a quiet depositional setting allowing fine-grained particles to settle down. The frequent occurrence of well-preserved palaeosiphonocladales is in favor of lagoonal sedimentation (Mamet and Préat, 1986) and might result from palaeosiphonocladales bafflestone dismantling. Occurrence of other algae such as *labyrinthoconus* and *Amphipora*, thick-shelled ostracods and calcispheres confirms a lagoonal deposition for this microfacies. It is likely deposited in a subtidal location within a lagoonal setting influenced by episodic high energy event such as storm waves which are reflected by the local bioclastic hash deposition.

*RS6-FF6: Mudstone*

This microfacies is mainly characterized by a limited fauna and flora, the common manifestation of irregular-shaped pockets filled by peloids in grainstone texture, and the dark micritic matrix. Rare whole and dislocated ostracod shells and unidentified fine-grained bioclasts are the only organisms occurring in this micritic mud. Irregular- or circular-shaped mm- to cm-sized pockets corresponding likely to bioturbation filled by peloids in a grainstone texture commonly occur. Peloids are variously-sized and rounded in shape. The fringe of pockets is dull and it is common to observe peloids embedded in the surrounding micritic mud. Irregular and circular mm- to cm-sized fenestrae filled by sparitic cement are also occurring locally. This sediment is locally overlain by RS3-LT7 throughout sharp or gradual contact.

*Interpretation:*

Similar microfacies from the Upper Givetian of southern Belgium have been interpreted by Boulvain and Préat (1986; Type 4) as deposited in intertidal to subtidal pond located in an internal lagoonal setting. According to Boulvain and Préat (1986) those ponds act as sediment trap and were covered by peloidal sand and algal or lithic debris in relation with successive flooding of the tidal complex. Texture of the sediment, common occurrence of bioturbation filled by peloidal sand and the locally overlying peloidal and lithoclastic grainstone are in agreement with interpretations of (Boulvain and Préat, 1986). The cm-sized lithoclasts occurring from time to time may be the result of desiccation cracks reworking. Further, the limited occurrence of fauna and flora reflects a restricted environment hostile to live. This microfacies is thus deposited in lagoonal setting within inter- to subtidal location.

*RS6-LT14: Laminated mudstone – peloidal grainstone*

This is a similar microfacies to the one observed in La Thure section. However, in the Fromelennes-Flohimont section this microfacies is mainly characterized by couplets of micrite alternating with peloidal grainstone arranged in a spar growth pattern. Indeed, variability is less marked in the Fromelennes-Flohimont road section. Within the Fromelennes-Flohimont section RS6-LT14a microfacies is dominant with microfacies RS6-FF5 and 6 while in the La Thure section RS6-FF5 and 6 are absent at time-equivalent periods. Furthermore, time-equivalent facies in the La Thure section are richer in silt-sized and quartz grains.

**Facies Belt 7: Supratidal internal shelf**

*RS7-FF7: Palaeosoils*

At the outcrop scale this microfacies is characterized by breccia fabric constituted of angular mm- to cm intraclasts floating in argillaceous matrix. These intraclasts show a mudstone texture and a poor faunal assemblage (c.f. RS6-FF5) characterized by palaeosiphonocladales algae, ostracods and calcispheres. Peloids and mudstone lithoclasts are also observed locally. Vertical fenestrae filled by calcite follow the rim of intraclasts. The matrix is argillaceous and rich in silt-sized quartz grains. Pressure solution seams are frequent and can locally show a haematitic coating. Hematite is frequently observed within the argillaceous matrix, either as cubic or xenomorphic crystal.

*Interpretation*:

The mudstone texture, the typical restricted fauna and the occurrence of intraclasts indicate inter- to supratidal setting similar to the one described for RS6-LT15. According to Bhattacharyya and Chakraborty (2000), an abundance of argillaceous materials filling space between intraclasts is characteristic of illuviation processes specific to palaeosoils. Furthermore, the breccia fabric is a common characteristic of palaeosoils (Tucker and Wright, 1990).

Summary table for the La Thure section microfacies showing label updates (if the label was update, the former one as in Pas et al. 2017 is in brackets)

| **Microfacies for the Givetian in the La Thure section (NW Belgium) with label update in brackets** | | | | |
| --- | --- | --- | --- | --- |
| **Micro-facies number** | **Name** | **Main diagnostic features** | **Bedding, color and sedimentary structures** | **Depositional setting** |
| *Drowning shelf model (DS)* | | | | |
| **DS-LT1** | Brachipod-bivalve shells packstone-rudstone | Limestone with brachiopods, bivalves, gastropods, crinoids. Poorly- to moderatly-sorted. Common bioturbations | Decimetre thick homogeneous dark-grey to black limestone beds | Drowned lagoon below the FWWB |
| *Homoclinal Ramp model (RP)* | | | | |
| **RP1-LT1** | Bioclastic mudstone to packstone | Limestone rich in insoluble residues commonly dolomitized. With poorly-preserved crinoids, brachiopods and unidentified shells,gastropods, ostracods, bryozoans, worm tubes, tabulate corals and stomatoporoids | Cm- to dm-thick black to dark-grey argillaceous beds | Mid- to distal-ramp below the FWWB with storm deposit occurrences |
| **RP1-LT2** | Crinoidal packstone-grainstone | Coarse-grained crinoids (with micritized rims), gastropods (with common micrite filling internal molds) and bioturbations | Cm- to dm-thick argillaceous black to dark-grey limestone beds | Mid- to distal-ramp below the FWWB with storm deposit occurrences |
| *Rimmed shelf (RS)* | | | | |
| **Facies belt 2: Biostrome and fore-reef shelf** | | | | |
| **RS2-LT1** (RS1-LT1) | Open-marine bioclastic wackestone-packstone | Crinoids, brachiopods, ostracods, trilobites, bryozoans, Tentaculitids and local debris of branching tabulate and rugose corals, and stromatoporoids | Dm-thick coarse-grained dark-blue limestone beds | Open-marine setting located below the FWWB slightly influenced by reefal-construction (barrier-reef or patch-reef) |
| **RS2-LT2** (PF1-LT2) | Coral-stromatoporoids rudstone and flaotstone | Dm-sized stromatoporoids (laminar and bulbous), solitary rugose corals, branching tabulate corals, crinoids, brachiopods, trilobites | Coarse-grained dark-blue to dark-grey limestone with large and broken reef-builders in non-living position | Open-marine setting located below the FWWB strongly influenced by reefal construction (barrier-reef or patch-reef) |
| **Facies belt 3: Bioclastic shoals** | | | | |
| **RS3-LT3** (RS2-LT3) | Calcimicrobial bio-lithoclastic grainstone | *Girvanella*, *Sphaerocodium,* gastropods, rare and poorly-preserved brachiopods, worm tubes, stromatoporoids | Dm-thick dark-blue to dark-grey limestone beds | Open-marine temporarily agitated setting located in the internal shelf margin |
| **RS3-LT4** (RS2-LT4) | Peloidal – lithoclastic grainstone with gastropods and mud-coated grains | Peloids and micritic lithoclasts, gastropods, brachiopods, crinoids, ostracods and rare tabulate corals and bryozoans | Dm-thick dark blue to dark-grey limestone | Peloid bars within the FWWB at the of internal shelf margin |
| **Facies belt 4: Internal shelf with good circulation** | | | | |
| **RS4-LT5** (RS3-LT5) | Mudstone to packstone with lithoclastic - brachiopods rudstone-grainstone layers and pockets | Brachiopod shells, thick-walled ostracods, gastropods, worm tubes and micritic lithoclasts within grainstone | Dm-thick dark-blue limestone | Internal shelf with open-water circulation located under the FWWB but likely subject to tides or storm flow |
| **RS4-LT6** (RS3-LT6) | *Magnella* shell grainstone and rudstone | *Magnella* shells and peloids | Pluri cm thick beds | Storm deposits within an internal shelf setting |
| **RS4-LT7** (RS3-LT7) | Stromatoporoid rudstone | Broken bulbous and dendroid stromatoporoids, branching tabulate, fasiculate rugose corals, *Sphaerocodium* and frequent palaeosiphonocladales | Dm-thick dark-blue beds | Setting with limited connection to fully-marine setting |
| **RS4-LT8** (RS3-LT8) | Palaeosiphonocladales wackestone – packstone | Abundance of issinellid and palaeoberesellidalgae, brachiopod shells, ostracods and *Grivanella* oncoids | Dm-thick dark-blue beds | Subtidal setting in the vicinity of palaeosiphonocladale grass |
| **RS4-LT9** (RS3-LT9) | Burrowed calcisphere mudstone | Vertical burrow filled by calcite | Dm-thick dark-blue beds | Protected setting below the FWWB |
| **RS4-LT10a** (PF3-LT10a) | Oolitic grainstone-packstone | Type 3 ooids and locally Type 1 of Strasser (1986) | Cm- to dm-sized light- to dark-grey bed | Oolitic shoal developed intermittently agitated water in internal shallow platform setting |
| **Facies belt 5: Internal restricted shelf** | | | | |
| **RS5-LT10b** (RS4-LT10b) | Oolitic peloidal grainstone-packstone | Type 2 and 4 ooids of Strasser (1986) | Cm- to dm-sized light- to dark-grey bed | Lagoonal setting with calm- to moderately-agitated water energy |
| **RS5-LT10c** (RS4-LT10c) | Oolitic lithoclatic grainstone-packstone | Type 4 ooids of Strasser (1986) | Cm- to dm-sized light- to dark-grey bed | Lagoonal setting with local higher energy-event |
| **RS5-LT11** (RS4-LT11) | Lithoclastic rudstone | Peloidal and oolitic grainstone lithoclasts | Cm- to dm-sized light- to dark-grey bed | Lagoonal setting in the vicinity of PF3-LT10a |
| **Facies belt 5: Evaporitic internal shelf** | | | | |
| **RS6-LT12** (RS6-LT12) | Dendroid stromatoporoids rudstone – flaotstone | *Stachyodes* and *Amphipora*, *Girvanella*, *Renalcis* lumps and stromatoporoids | Pluri-dm-sized beds with local erosive base | Reworked stromatoporoids patch-reef in internal setting |
| **RS6-LT13** (RS5-LT12) | Algal microbial boundstone | Micritic tubular structures, clotted fabric, ostracods and worm tubes | Cm- to dm-sized beds | Shrub-like structure in quiet shallow-marine internal setting |
| **RS6-LT14** (RS5-LT14) | Laminated mudstone - peloidal grainstone-packstone | Alternation of peloidal grainstone and mudstone layer or light and darker micritic laminae with locally well-spread silt-sized quartz | Dm-thick beds | Tidal-channel and levees bordering channel and intertidal pounds in supratidal setting |
| **RS6-LT14** (RS5-LT15) | Intraclastic rudstone - grainstone | Cm-sized mudstone and grainstone intraclasts, oolite and sparitic cement | Dm-thick yellow-earth beds | Reworking in tidal-channel setting |

Reference list

Bhattacharyya, A., Chakraborty, C., 2000. Analysis of Sedimentary Successions. A field manual. A.A. Balkema/Rotterdam/Brookfield/, Rotterdam, 408 pp.

Boulvain, F., Préat, A., 1986. Les calcaires laminaires du Givétien Supérieur du bord sud du Bassin de Dinant (Belgique, France): Témoins d'une évolution paléoclimatique. Annales de la Societé Géologique de Belgique, 109(2): 609-619.

Burchette, T.P., Wright, V.P., 1992. carbonate ramp depositional systems. Sedimentary Geology, 79: 3-57.

Cornet, P., 1975. Morphogenèse, caractères écologiques et distribution des stromatoporoïdes dévoniens au bord sud du bassin de Dinant (Belgique), Université Catholique de Louvain, Leuven.

Flügel, E., 2004. Microfacies analysis of carbonate rocks. Analysis, Interpretation and Application. Springer-Verlag, Berlin, 976 pp.

Mamet, B., 1991. Carboniferous Calcareous Algae. In: R. Rober (Ed.), Calcareous Algae and Stromatolites. Springer Berlin Heidelberg, pp. 370-451.

Mamet, B., Préat, A., 1986. Algues givetiennes du bord sud du bassin de Dinant et des régions limitrophes. Annales de la Société Géologique de Belgique, 109: 431-454.

Pohler, S.M.L., 1998. Devonian carbonate buildup facies in an intra-oceanic island arc (Tamworth Belt, New South-Wales, Australia). Facies(39): 1-34.

Strasser, A., 1986. Ooids in Purbeck limestones (lowermost Cretaceous) of the Swiss and French Jura. Sedimentology, 33(5): 711-727.

Tucker, M.E., Wright, V.P., 1990. Carbonate Sedimentology: 482.

Wood, R., 2000. Palaeoecology of a Late Devonian back reef: Canning Basin, Western Australia. Palaeontology, 43(4): 671-703.
